# Supplementary material for: Assessing West Nile virus (WNV) and Usutu virus (USUV) exposure in bird ringers in the Netherlands: a high-risk group for WNV and USUV infection?
Source: PubMed Central journal article supplement — One Health. 2023 Apr 7;16:100533. doi: 10.1016/j.onehlt.2023.100533 (PMC10288042; doi:10.1016/j.onehlt.2023.100533), 2023-04-07
Supplement: mmc2.pdf [file mmc2.pdf]

## USUV and/or WNV IgG reactive bird ringers (N = 37)

|        | PA IgG (NS1) |      |      |     | IgG PA result  | FRNT WNV | FRNT USUV | Interpretation                 | N         |
|--------|--------------|------|------|-----|----------------|----------|-----------|--------------------------------|-----------|
|        | WNV          | USUV | TBEV | JEV |                |          |           |                                |           |
| WN-133 | 28           |      |      |     | WNV            | 160      | 40        | <b>Confirmed WNV exposure</b>  | <b>1</b>  |
| WN-157 | 63           |      |      |     | WNV            |          |           | Possible WNV exposure          |           |
| WN-143 | 24           |      |      |     | WNV            | 10       |           | Possible WNV exposure          |           |
| WN-142 | 47           |      |      |     | WNV            | 20       |           | Possible WNV exposure          |           |
| WN-129 | 43           |      |      |     | WNV            |          |           | Possible WNV exposure          |           |
| WN-123 | 39           |      |      |     | WNV            |          |           | Possible WNV exposure          |           |
| WN-113 | 45           |      |      |     | WNV            |          |           | Possible WNV exposure          |           |
| WN-090 | 33           |      |      |     | WNV            |          |           | Possible WNV exposure          |           |
| WN-089 | 25           |      |      |     | WNV            |          |           | Possible WNV exposure          |           |
| WN-086 | 236          |      |      |     | WNV            |          |           | Possible WNV exposure          |           |
| WN-080 | 100          |      |      |     | WNV            |          |           | Possible WNV exposure          | <b>20</b> |
| WN-057 | 72           |      |      |     | WNV            |          |           | Possible WNV exposure          |           |
| WN-053 | 22           |      |      |     | WNV            |          |           | Possible WNV exposure          |           |
| WN-046 | 60           |      |      |     | WNV            |          |           | Possible WNV exposure          |           |
| WN-043 | 70           |      |      |     | WNV            |          |           | Possible WNV exposure          |           |
| WN-042 | 58           |      |      |     | WNV            | 10       |           | Possible WNV exposure          |           |
| WN-037 | 59           |      |      |     | WNV            |          |           | Possible WNV exposure          |           |
| WN-034 | 62           |      |      |     | WNV            |          |           | Possible WNV exposure          |           |
| WN-031 | 26           |      |      |     | WNV            |          |           | Possible WNV exposure          |           |
| WN-003 | 68           |      |      |     | WNV            |          |           | Possible WNV exposure          |           |
| WN-002 | 30           |      |      |     | WNV            | 20       |           | Possible WNV exposure          |           |
| WN-112 | 59           | 188  |      | 64  | USUV (WNV/JEV) | 20       | 160       | <b>Confirmed USUV exposure</b> | <b>1</b>  |
| WN-114 |              | 22   |      |     | USUV           |          |           | Possible USUV exposure         |           |
| WN-109 |              | 24   |      |     | USUV           |          |           | Possible USUV exposure         |           |
| WN-098 |              | 53   |      |     | USUV           | 20       | 10        | Possible USUV exposure         |           |
| WN-097 |              | 47   |      |     | USUV           |          |           | Possible USUV exposure         |           |
| WN-096 |              | 25   |      |     | USUV           |          | 10        | Possible USUV exposure         |           |
| WN-095 |              | 25   |      |     | USUV           |          | 20        | Possible USUV exposure         | <b>12</b> |
| WN-094 |              | 71   |      |     | USUV           |          | 20        | Possible USUV exposure         |           |
| WN-072 |              | 21   |      |     | USUV           |          |           | Possible USUV exposure         |           |
| WN-065 |              | 65   |      |     | USUV           | 10       |           | Possible USUV exposure         |           |
| WN-027 |              | 22   |      |     | USUV           |          |           | Possible USUV exposure         |           |
| WN-015 |              | 207  |      |     | USUV           |          |           | Possible USUV exposure         |           |
| WN-091 |              | 63   |      |     | USUV           | 40       | 40        | Possible USUV exposure         |           |
| WN-060 | 35           | 67   |      |     | USUV (WNV)     |          |           | Possible flavivirus exposure   |           |
| WN-158 |              | 62   | 23   |     | USUV (TBEV)    |          | 10        | Possible flavivirus exposure   | <b>3</b>  |
| WN-156 |              | 71   |      | 78  | USUV/JEV       |          |           | Possible flavivirus exposure   |           |
