# Supplementary material for: Assessing West Nile virus (WNV) and Usutu virus (USUV) exposure in bird ringers in the Netherlands: a high-risk group for WNV and USUV infection?
Source: PubMed Central journal article supplement — One Health. 2023 Apr 7;16:100533. doi: 10.1016/j.onehlt.2023.100533 (PMC10288042; doi:10.1016/j.onehlt.2023.100533), 2023-04-07
Supplement: mmc4.pdf [file mmc4.pdf]

Sample ID

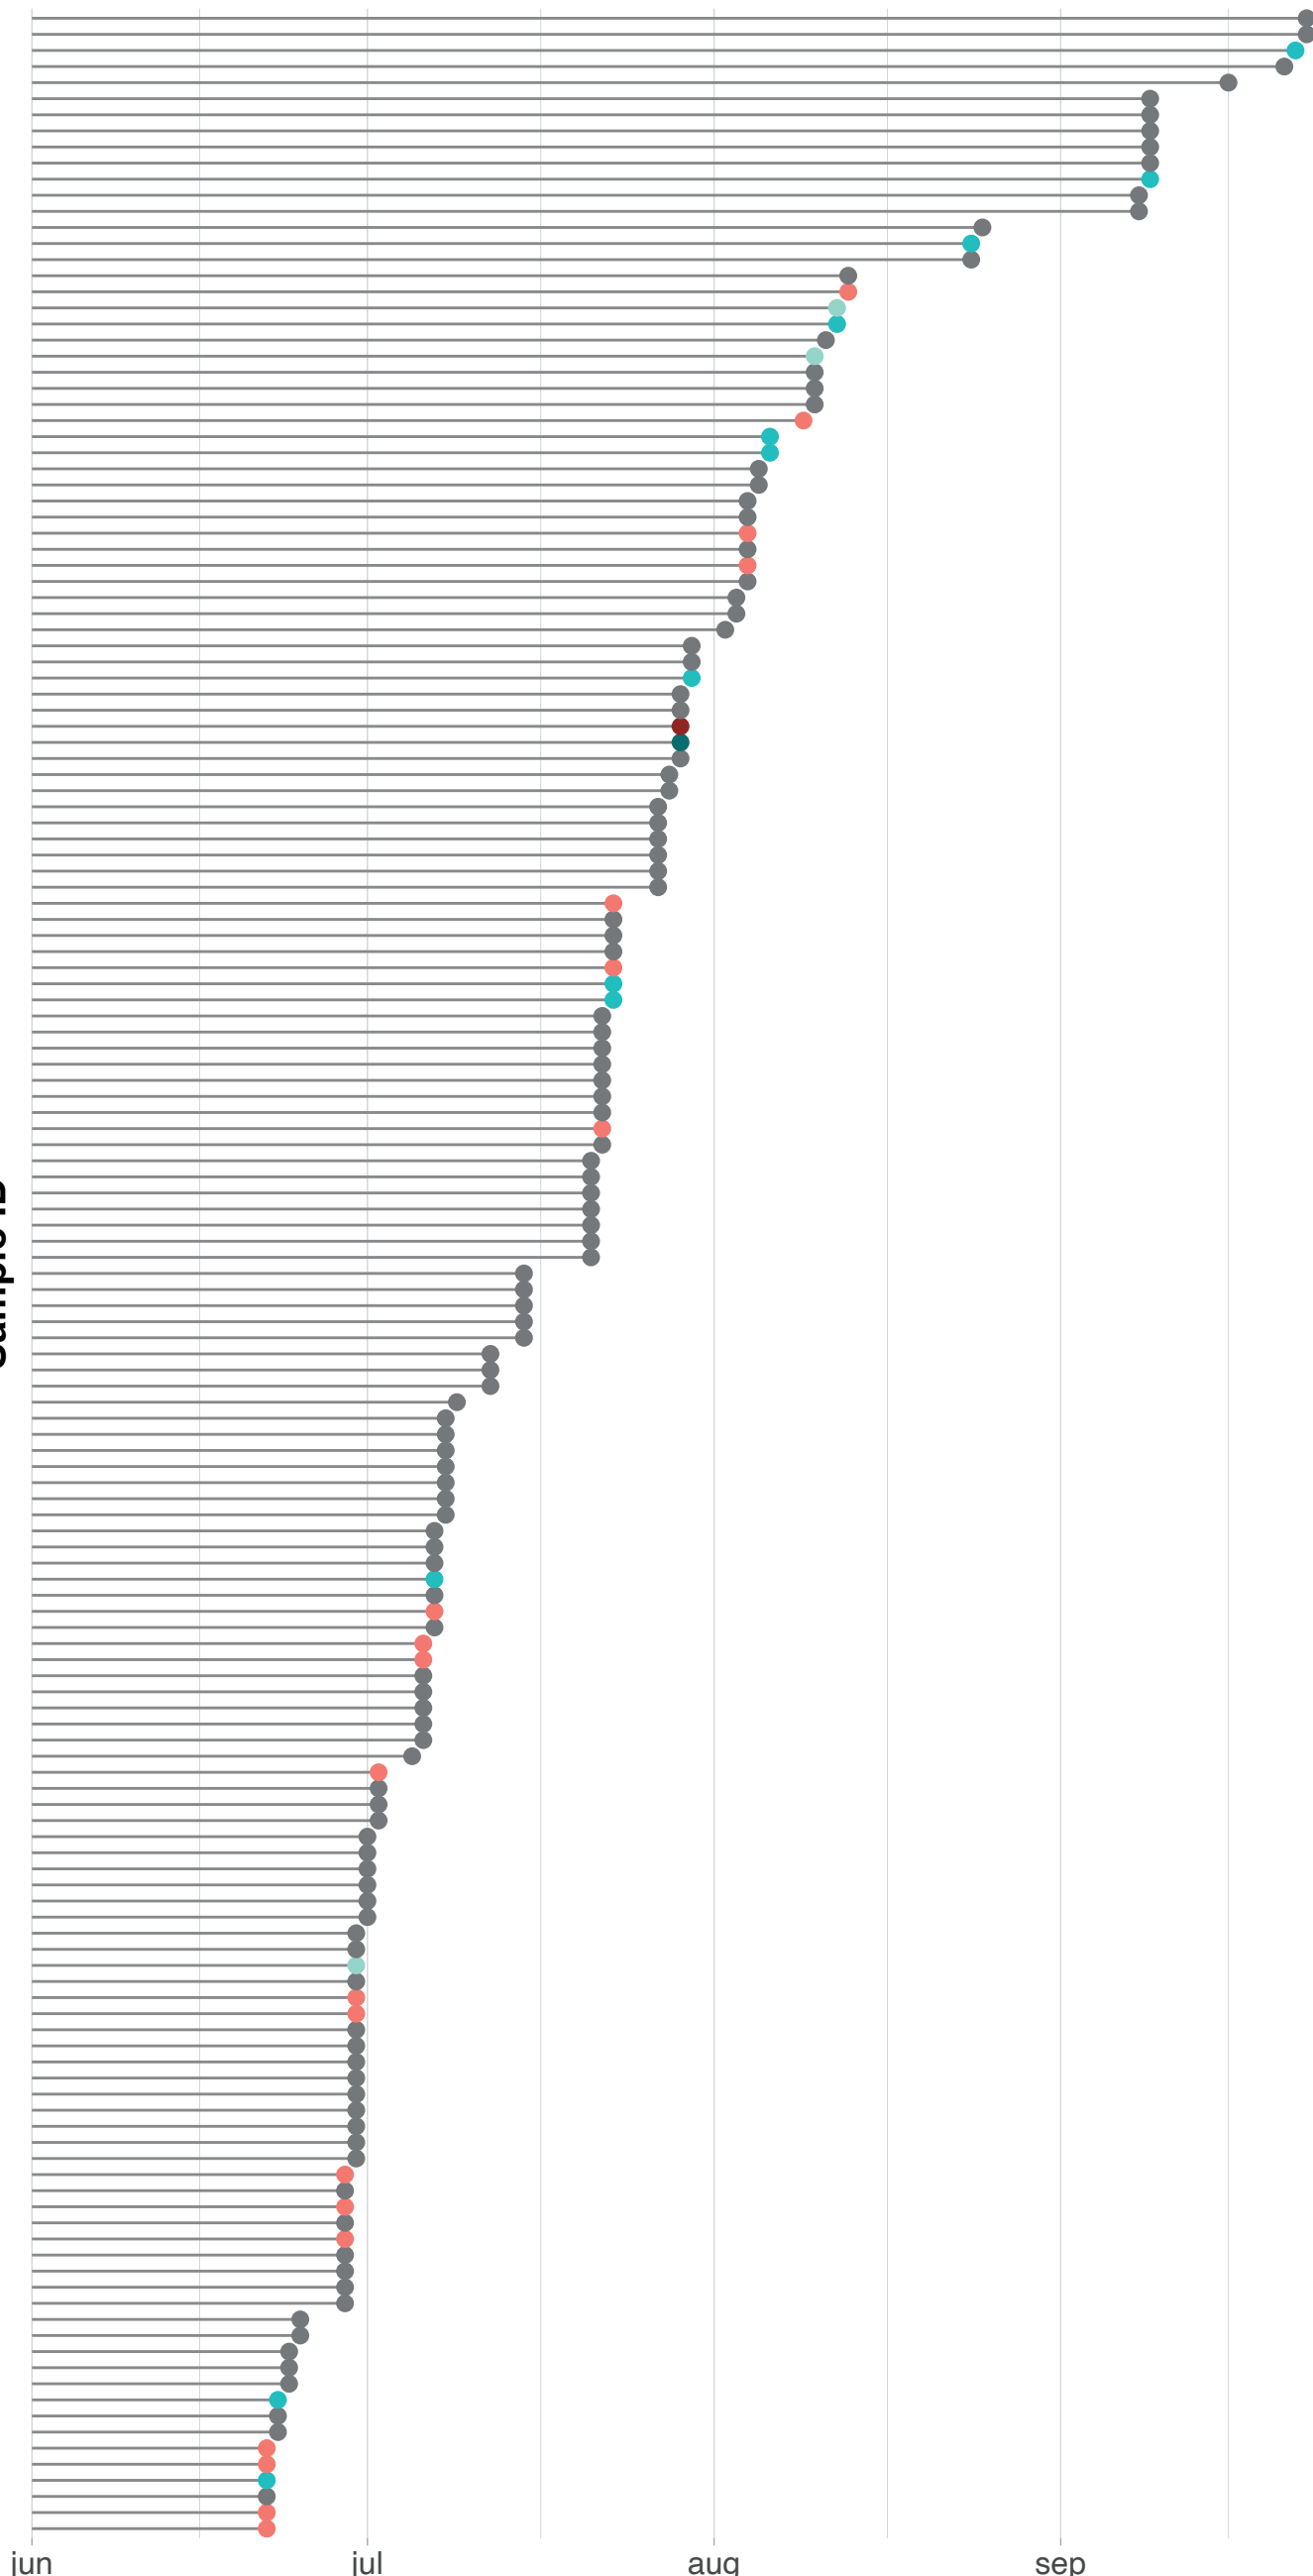

**Interpretation**

- Confirmed WNV exposure
- Possible WNV exposure
- Confirmed USUV exposure
- Possible USUV exposure
- Possible flavivirus exposure
- USUV and WNV Negative

jun jul aug sep

Date of sample collection (2021)
