# Supplementary figures and images for: Assessing West Nile virus (WNV) and Usutu virus (USUV) exposure in bird ringers in the Netherlands: a high-risk group for WNV and USUV infection?
Source: PubMed Central journal article supplement — One Health. 2023 Apr 7;16:100533. doi: 10.1016/j.onehlt.2023.100533 (PMC10288042; doi:10.1016/j.onehlt.2023.100533), 2023-04-07

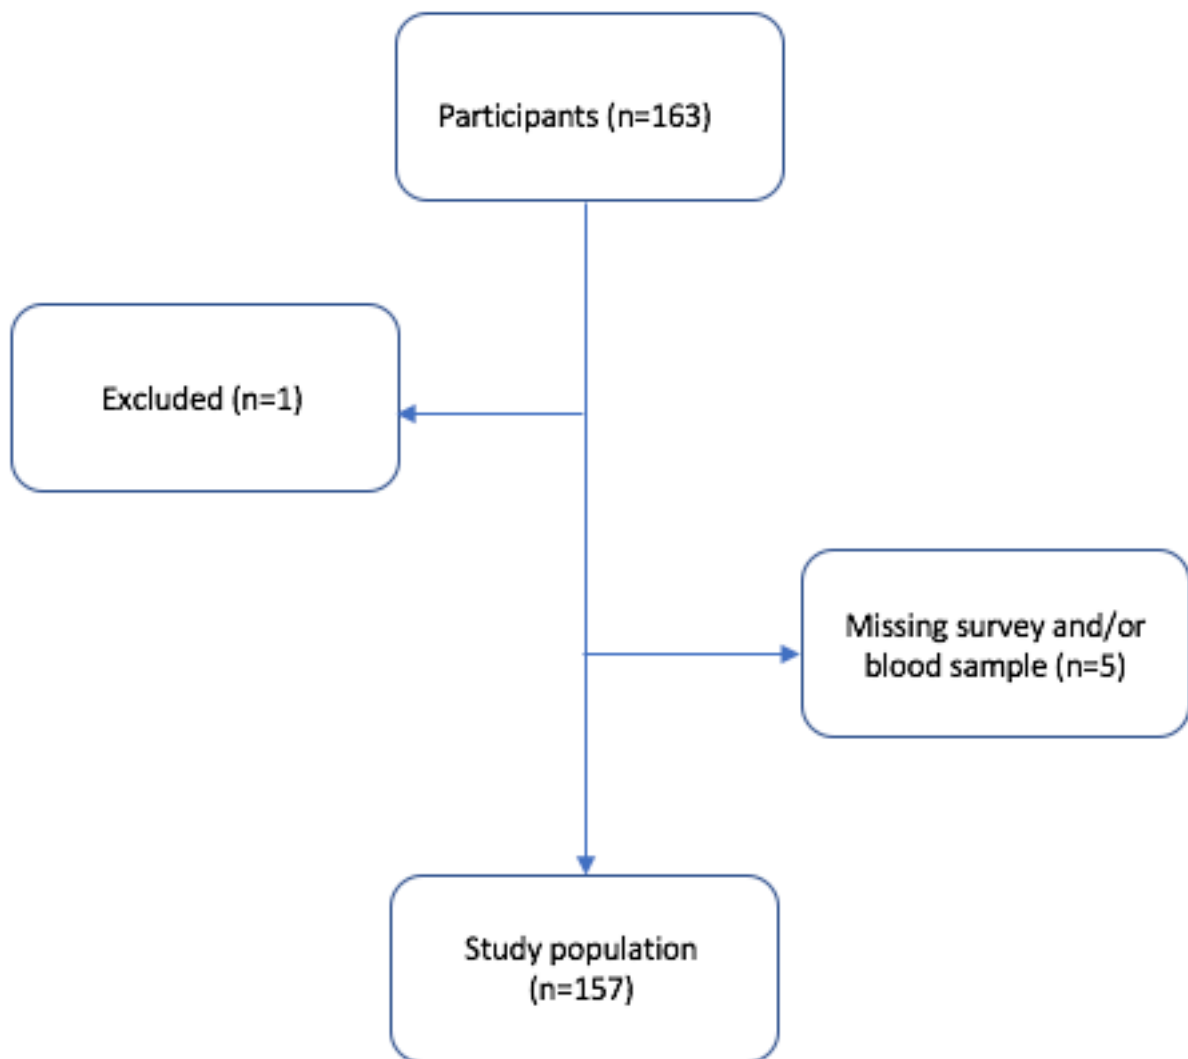

Supplement: mmc1.pdf [file mmc1.pdf]

A

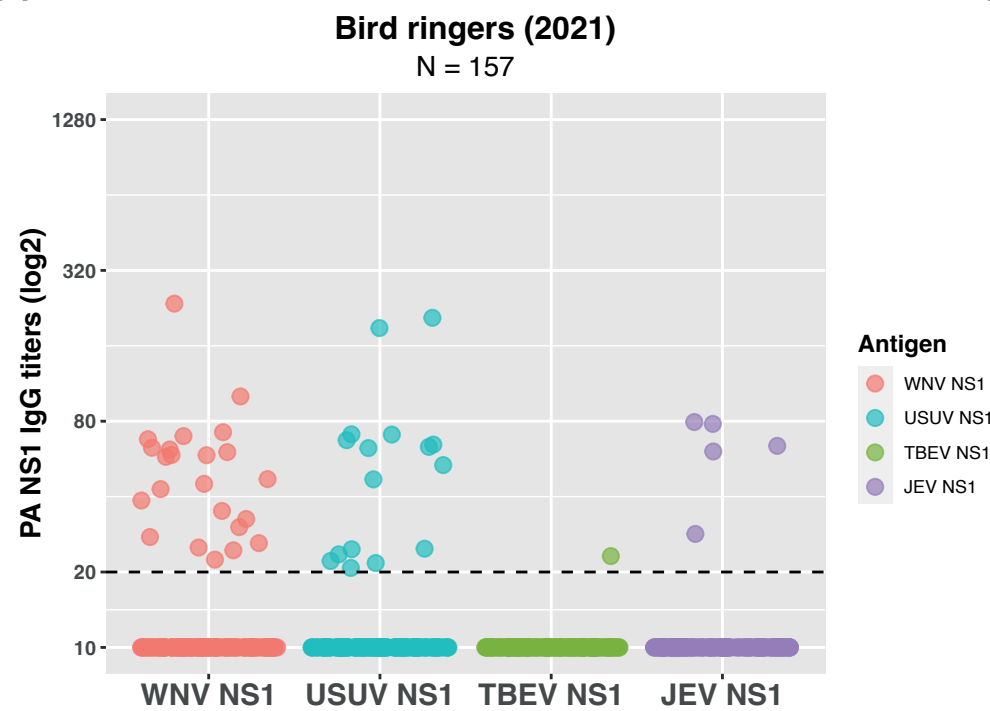

B

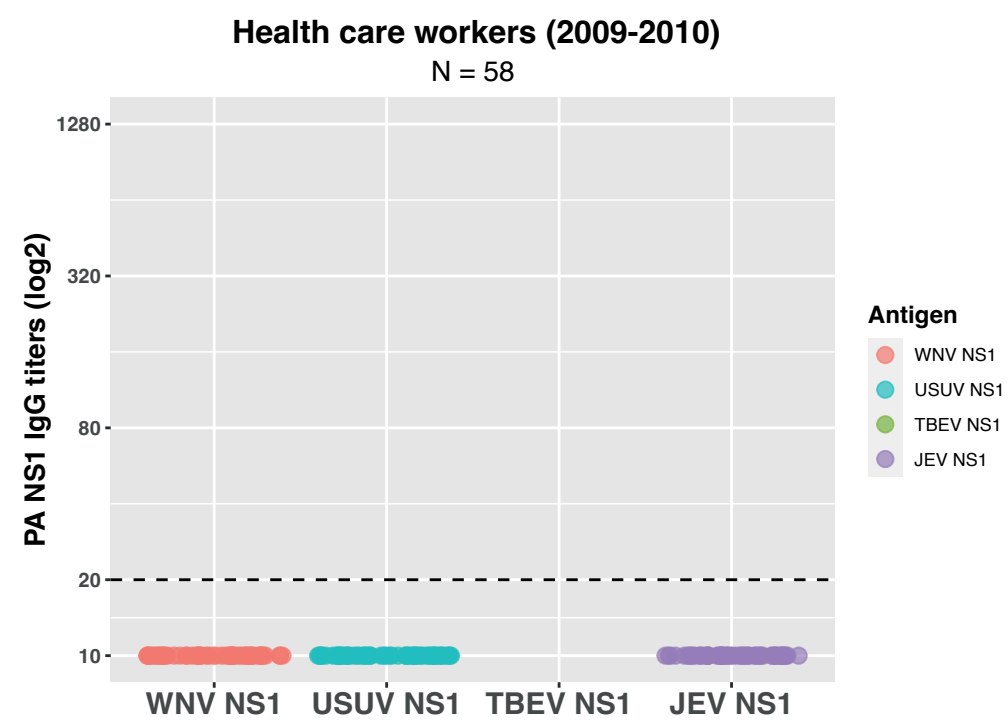

C

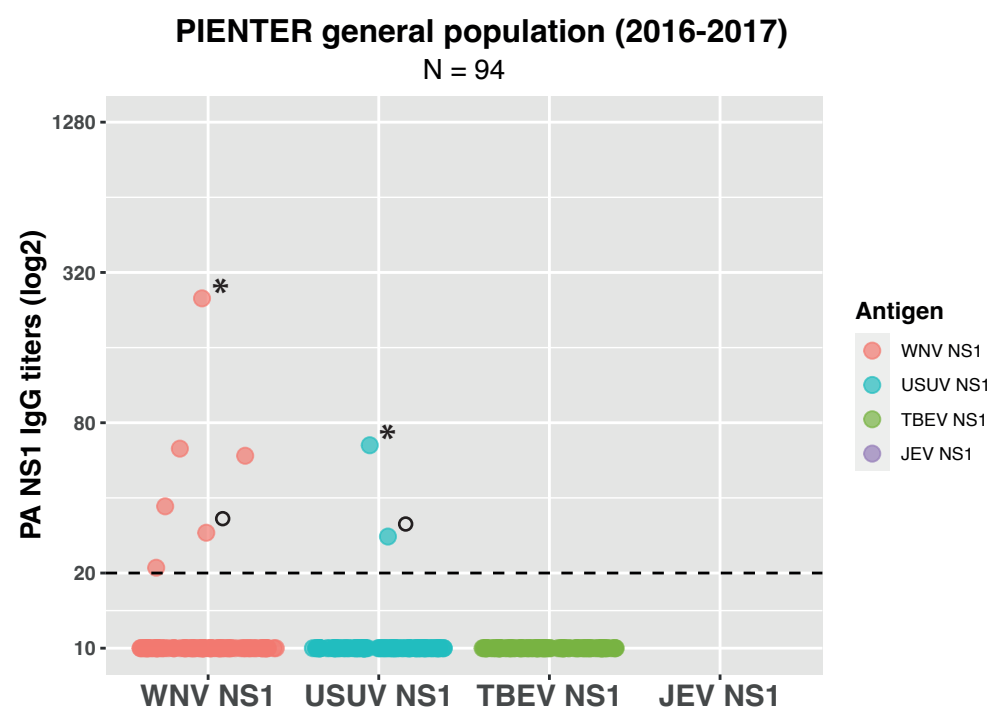

D

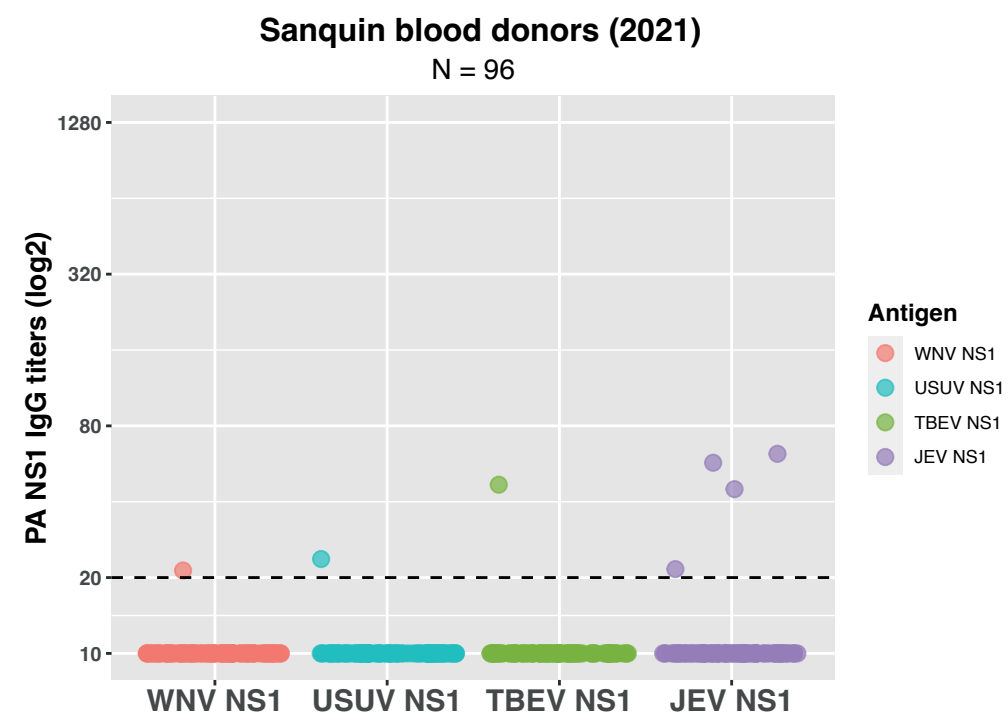

Supplement: mmc3.pdf [file mmc3.pdf]

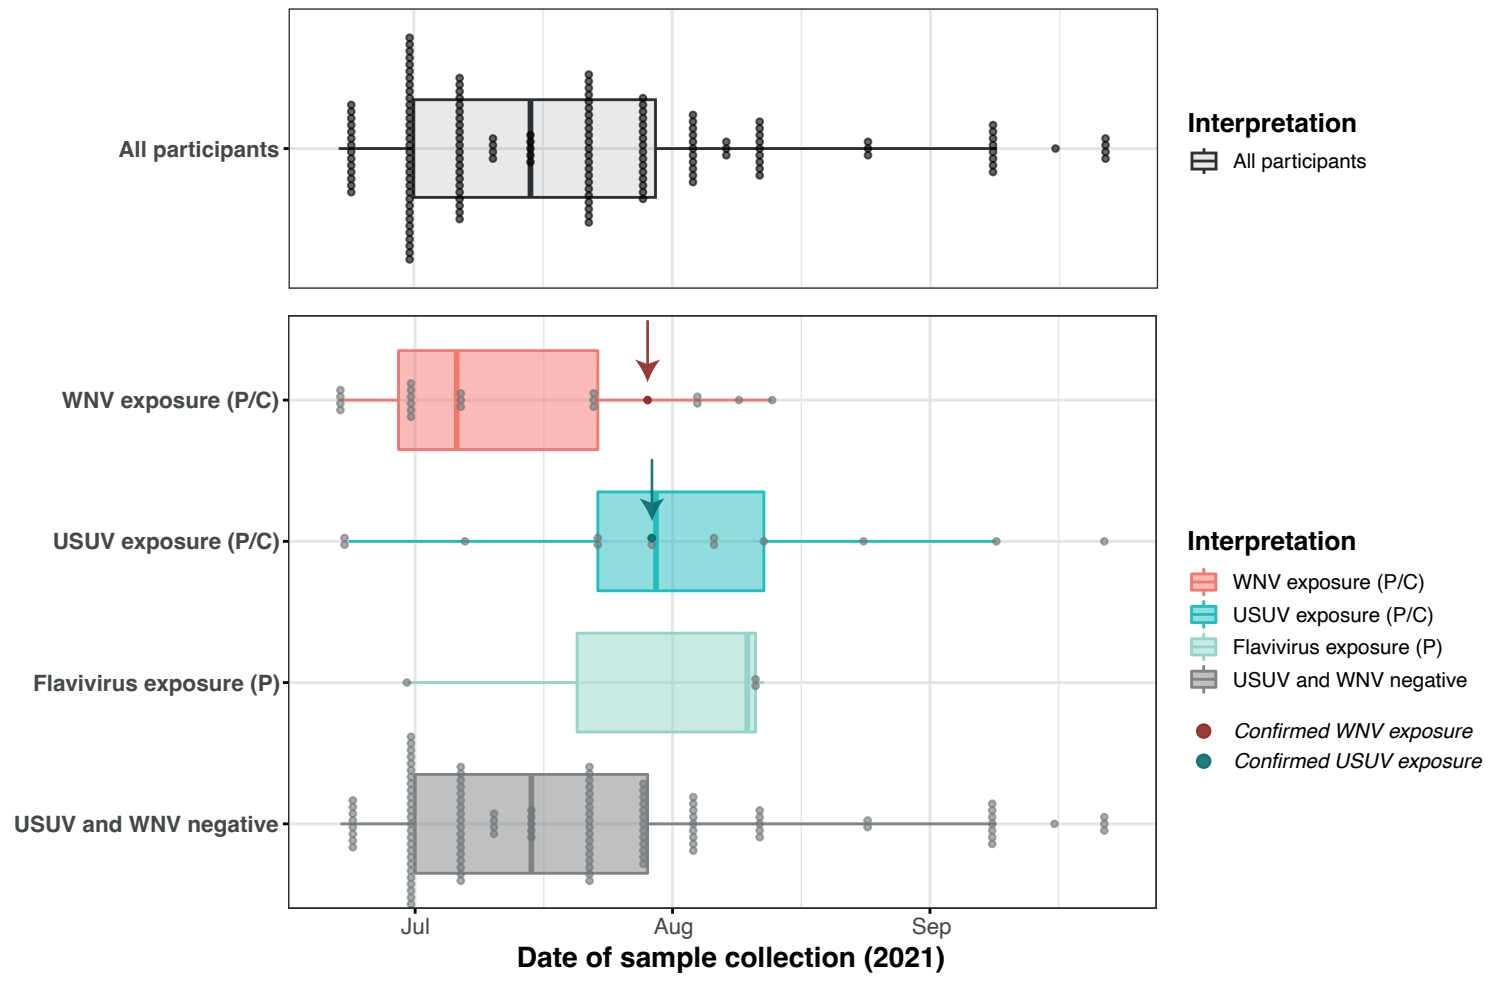

Supplement: mmc5.pdf [file mmc5.pdf]
